1 **A member of the ferlin calcium sensor family is essential for *Toxoplasma***  
2 ***gondii* rhoptry secretion**

3

4 Bradley I. Coleman<sup>a\*</sup>, Sudeshna Saha<sup>a\*</sup>, Seiko Sato<sup>b</sup>, Klemens Engelberg<sup>a</sup>, David J. P.  
5 Ferguson<sup>c</sup>, Isabelle Coppens<sup>d</sup>, Melissa B. Lodoen<sup>b</sup> & Marc-Jan Gubbels<sup>a#</sup>

6

7 <sup>a</sup>Department of Biology, Boston College, Chestnut Hill, Massachusetts, USA

8 <sup>b</sup>Department of Molecular Biology & Biochemistry and the Institute for Immunology,  
9 University of California, Irvine, California, USA

10 <sup>c</sup>Nuffield Department of Clinical Laboratory Science, University of Oxford, John  
11 Radcliffe Hospital, Oxford, United Kingdom

12 <sup>d</sup>Department of Molecular Microbiology and Immunology, Johns Hopkins University  
13 Bloomberg School of Public Health, Baltimore, Maryland, USA

14

15 Running Head: *T. gondii* ferlin 2 is required for rhoptry secretion

16

17 #Address correspondence to Marc-Jan Gubbels, [gubbelsj@bc.edu](mailto:gubbelsj@bc.edu).

18 \*Present address: Bradley. I Coleman, Harvard Medical School, Boston, Massachusetts,  
19 USA; Sudeshna Saha, University of California, San Diego, School of Medicine, San  
20 Diego, California, USA

21 B.I.C. and Su.Sa. contributed equally to this work

22 **Abstract**

23

24 Invasion of host cells by apicomplexan parasites such as *Toxoplasma gondii* is critical for  
25 their infectivity and pathogenesis. In *Toxoplasma*, secretion of essential egress, motility  
26 and invasion-related proteins from microneme organelles is regulated by oscillations of  
27 intracellular  $Ca^{2+}$ . Later stages of invasion are considered  $Ca^{2+}$ -independent, including  
28 the secretion of proteins required for host cell entry and remodeling from the parasite's  
29 rhoptries. We identified a family of three *Toxoplasma* proteins with homology to the  
30 ferlin family of double C2 domain-containing  $Ca^{2+}$  sensors. In humans and model  
31 organisms such  $Ca^{2+}$  sensors orchestrate  $Ca^{2+}$ -dependent exocytic membrane fusion with  
32 the plasma membrane. One ferlin that is conserved across the Apicomplexa, TgFER2,  
33 localizes to the parasite's cortical membrane skeleton, apical end, and rhoptries.  
34 Unexpectedly, conditionally TgFER2-depleted parasites secreted their micronemes  
35 normally and were completely motile. However, these parasites were unable to invade  
36 host cells and were therefore not viable. Specifically, knockdown of TgFER2 prevented  
37 rhoptry secretion and these parasites failed to form the moving junction on the parasite-  
38 host interface necessary for host cell invasion. Collectively, these data demonstrate that  
39 the putative  $Ca^{2+}$  sensor TgFER2 is required for the secretion of rhoptries. These findings  
40 provide the first regulatory and mechanistic insights into this critical yet poorly  
41 understood aspect of apicomplexan host cell invasion.

42

43 **Graphical abstract**

44

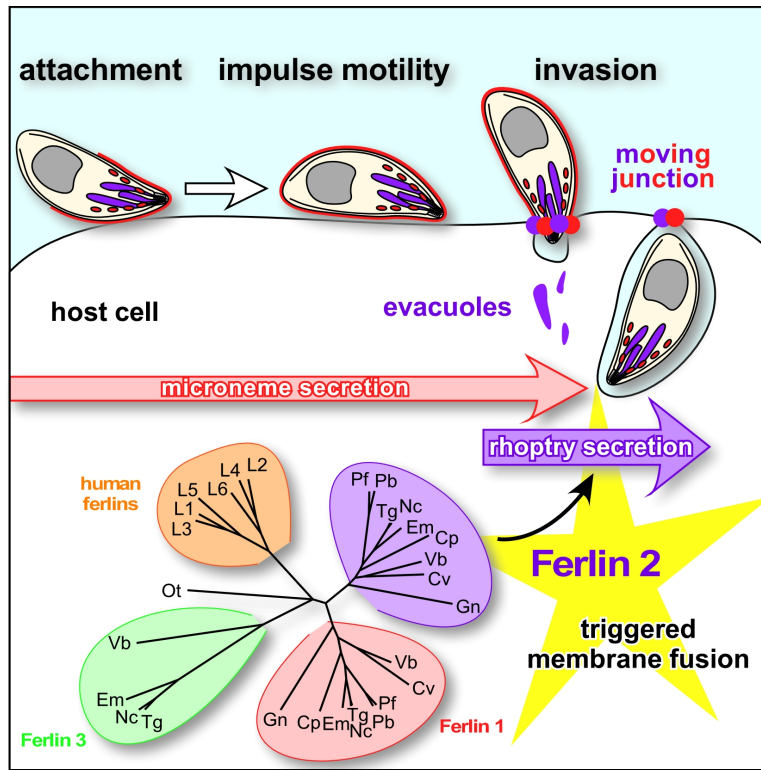

45

## 46 **Introduction**

47

48 The apicomplexan parasite *Toxoplasma gondii* infects one in every three humans.  
49 Clinical symptoms of toxoplasmosis derive from the tissue destruction and inflammation  
50 caused by repeated rounds of host cell invasion, intracellular replication, and lytic egress  
51 of the tachyzoite life stage. Egress is mediated by intracellular  $\text{Ca}^{2+}$   $[\text{Ca}^{2+}]_i$  fluctuations  
52 that trigger release of proteins from the microneme organelles (1). Following egress,  
53 parasites move via gliding motility to a new host cell, triggered by additional parasite  
54  $[\text{Ca}^{2+}]_i$  oscillations facilitating further release of micronemes (2). Subsequent host cell  
55 invasion also relies on micronemal proteins (3). The micronemes are localized at the  
56 apical end of the parasite, and are released from the apical tip (4). Following initial  
57 recognition of a host cell, the parasite engages in a tighter interaction with the target cell,  
58 mediated by proteins secreted from the rhoptries. The club-shaped rhoptries are anchored  
59 at parasite's apical end from where they secrete their contents (5, 6). Proteins in the  
60 apical rhoptry neck (RONs) are secreted into the host cell before the proteins residing in  
61 the more basal rhoptry bulb (ROPs) are released (7). RONs function in tightening the  
62 parasite:host attachment interface by forming a moving junction (MJ) whereas ROPs  
63 modulate a variety of host cell pathways to accommodate intracellular replication (6).  
64 Rhoptry secretion must be preceded by microneme secretion and requires recognition of a  
65 host cell, but their release is generally assumed to be  $\text{Ca}^{2+}$ -independent although the  
66 molecular details of the underlying signal transduction pathways and the mechanism of  
67 rhoptry exocytosis remain obscure (10). Both the micronemes and rhoptries are  
68 conserved across Apicomplexa and are key to the intracellular life style of these  
69 pathogens (9). The last step in establishing infection of a new cell is secretion of host  
70 cell-remodeling proteins from the parasite's dense granules, which again is believed to be  
71 a  $\text{Ca}^{2+}$ -independent process.

72 The  $\text{Ca}^{2+}$  signal during egress and invasion is transduced by several molecular  
73 mechanisms, including calmodulin (2), calcineurin (11),  $\text{Ca}^{2+}$ -dependent protein kinases  
74 (CDPK1 (12), CDPK3 (13-15)), and at the point of microneme exocytic membrane  
75 fusion by the DOC2.1 protein (16), referred to as TgDOC2 hereafter. The organization of  
76 TgDOC2 is unusual compared to well-studied  $\text{Ca}^{2+}$ -triggered exocytosis models since the

77 only identifiable domain in this large protein is the namesake double C2 domain  
78 (“DOC2”). In model organisms coordination between at least three DOC2 domain  
79 proteins execute the  $\text{Ca}^{2+}$ -mediated vesicle fusion with the plasma membrane typically in  
80 combination with a transmembrane domain in one or two proteins (18, 21-23).  $\text{Ca}^{2+}$   
81 exerts its function through association with positionally conserved Asp residues in C2  
82 domains, which then associate with membrane or other proteins facilitating membrane  
83 fusion (17, 18). The ferlins make up a unique branch of the DOC2 domain protein family  
84 tree as they contain five to seven C2 domains rather than two, and they are relatively  
85 large (200-240 kDa). The ferlins comprise an ancient eukaryotic protein family present in  
86 most protozoa (except amoeba and fungi) including the Apicomplexa and all metazoa  
87 (except higher plants) (19). Although ferlins are not expressed in neurons and lacking in  
88 yeast they are relatively understudied, they typically function in membrane fusion,  
89 vesicle trafficking and membrane repair, Dysfunction of human ferlins can cause  
90 deafness and muscular dystrophy (20).

91 To better understand the machinery underlying *Toxoplasma*  $\text{Ca}^{2+}$ -mediated  
92 exocytosis we evaluated the DOC2 domain family in the Apicomplexa. Next to  
93 TgDOC2.1 (16) we identified three members of the ferlin family, two of which are  
94 widely conserved across Apicomplexa. We determined that TgFER2, the most-conserved  
95 representative, is essential for host cell invasion and required for rhoptry secretion. These  
96 findings provide critical insight into the poorly understood mechanisms of rhoptry  
97 secretion while raising the possibility that, contrary to common assumptions, rhoptry  
98 secretion is a  $\text{Ca}^{2+}$ -dependent process.

99

## 100 **Results**

101

102 **The *T. gondii* genome encodes three ferlin proteins.** Next to TgDOC2, A series of  
103 BLAST searches of the *Toxoplasma* genome identified four additional proteins  
104 containing two or more C2 domains of which three also contained a transmembrane  
105 domain. Two proteins had clear homology to the ferlin family of  $\text{Ca}^{2+}$  sensitive  
106 membrane fusion proteins (Fig. 1A). We named these proteins TgFER1  
107 (TGME49\_309420) and TgFER2 (TGME49\_260470). The other DOC2 proteins,

108 TGME49\_295472 and TGME49\_295468, are adjacent in the genome but these are  
109 annotated as a single gene in the ontological region in *Neospora* and *Eimeria spp.* This  
110 merged protein also possesses the global architecture of a ferlin, and was named TgFER3,  
111 but it diverges from the family by its extensive degeneration of C2 domains and unusual  
112 length: with 2670 amino acids TgFER3 is 40% longer than the other ferlins (Fig. 1A).

113 Using human otoferlin as a reference, the C2 domains in *T. gondii* ferlins 1-3  
114 follow the typical paired C2 pattern (Fig. 1A). The absence of the C2A domain in  
115 TgFER1 and TgFER2 is not unusual as this domain is missing in the majority of studied  
116 ferlins (19). All ferlins studied to date contain the FerI domain of as yet unknown  
117 function, which is present in TgFER1, slightly degenerate in TgFER2, and undetectable  
118 in TgFER3. We queried the conservation of ferlins in representative apicomplexan  
119 organisms and their closest free-living relatives, the Chromerids (24). Clear orthologs of  
120 TgFER1 and TgFER2 were universally present, but TgFER3 orthologs were restricted to  
121 the Coccidia (*Neospora*, *Sarcocystis*, *Eimeria*) and somewhat surprisingly, to the  
122 chromerid *Vitrella brassicaformis* (Fig. 1B). This suggests that TgFER3 was present in  
123 the last common ancestor of Chromerids and Apicomplexa but was lost from all  
124 apicomplexan lineages except the Coccidia.

125

126 **TgFER2 is essential for completing the lytic cycle.** The most widely studied  $\text{Ca}^{2+}$ -  
127 mediated process in *Toxoplasma* is the release of microneme proteins. Given the  
128 documented roles of DOC2 and ferlins in  $\text{Ca}^{2+}$ -mediated secretion we hypothesized that  
129 apicomplexan ferlins are involved in microneme secretion. To test this hypothesis we  
130 probed the function of TgFER2 by replacing its promoter with a tetracycline regulatable  
131 promoter (25) and simultaneously inserted a single N-terminal Myc epitope to provide  
132 localization data (Fig. 2A). The genotype was validated by diagnostic PCR (Fig. 2B).  
133 Western blots of total parasite lysates probed with  $\alpha$ -Myc antibodies marked a single  
134 protein consistent with the 160 kDa predicted molecular weight of TgFER2 (Fig. 2C).  
135 Regulation of TgFER2 was demonstrated by exposing FER2-cKD parasites to anhydrous  
136 tetracycline (ATc) for 48 hours to block TgFER2 transcription. Myc-TgFER2 was  
137 undetectable by western blot (Fig. 2C) or IFA (Fig. 2D) confirming efficient protein  
138 knock-down. TgFER2-depleted parasites did not form plaques after 7 or 14 days (Fig.

139 2E). No observable changes in the morphology or growth rate of intracellularly  
140 replicating parasites was observed (see Fig. S1 in the supplemental material). TgFER2  
141 therefore does not function in cell division or replication but is essential for completion of  
142 *Toxoplasma*'s lytic cycle.

143

144 **TgFER2 localizes on the IMC, rhoptries and inside the conoid.** Myc-TgFER2  
145 localization by IFA revealed a dispersed pattern not reminiscent of any defined  
146 *Toxoplasma* feature (Fig. 2D). Since the transmembrane domain is predictive of  
147 membrane association, we resolved the localization by immunoelectron microscopy  
148 (IEM). In intracellular parasites a comparatively small number of gold particles were  
149 distributed throughout the cytoplasm (Fig. 3A). Gold was notably enriched at the  
150 cytoplasmic side of the inner membrane complex (IMC) (Figs. 3A, B) and within the  
151 internal structures of the conoid at the apical end (Figs. 3A, C-E). Since intracellular  
152 parasites do not actively secrete micronemes, the TgFER2 localization might be different  
153 in extracellular parasites that are actively secreting micronemes. In extracellular parasites  
154 we indeed observed a different pattern with gold particles patched on the cytoplasmic  
155 side of the rhoptries (Fig. 3F-H). Critically, TgFER2 labeling was not specifically  
156 observed on the micronemes in either intracellular or extracellular parasites, which  
157 appeared to be inconsistent with our initial hypothesis of a role for FER2 in microneme  
158 secretion.

159

160 **TgFER2 is not required for microneme secretion and conoid extrusion.** To  
161 determine the lethality of TgFER2-depleted parasites we first assayed parasite egress.  
162 After 48 or 96 hours of ATc treatment, FER2-ckD parasites egressed normally when  
163 treated with  $\text{Ca}^{2+}$  ionophore A23187 (see Fig. S2 in the supplemental material). This  
164 suggests that the micronemes are secreted normally. The morphology and distribution of  
165 micronemes in TgFER2-depleted parasites is also normal by IFA and TEM (see Fig. S3  
166 in the supplemental material). Since TgFER2 is present in the conoid we also examined  
167 conoid extrusion as another  $\text{Ca}^{2+}$ -regulated process (26). Fig. S4 in the supplemental  
168 material shows that conoid extrusion is normal in the TgFER2 mutant.

169           Next we directly tested microneme protein secretion through Mic2 release (27).  
170 Both untriggered, low-level constitutive secretion and Ca<sup>2+</sup> ionophore-induced  
171 microneme secretion occurred normally in the absence of TgFER2 (Fig. 4A, B). It is now  
172 apparent that micronemes are not uniform and that distinct populations containing  
173 distinct proteins exist within the parasite (28). We therefore reasoned that TgFER2 might  
174 act differentially on these populations and that this might explain our observations. Mic2  
175 is secreted from a Rab5a/c-dependent population of micronemes. Another component of  
176 this population, Mic10, was also secreted normally in TgFER2-depleted parasites (Fig.  
177 4A). To examine secretion from the Rab5a/c-independent population containing Mic  
178 proteins 3, 5, 8 and 11 we first assayed Mic8 secretion by western blot. This also  
179 proceeded normally in the absence of TgFER2. Labeling of Mic3, 5 and 8 by IFA on  
180 non-permeabilized parasites (29, 30) also confirmed secretion of these proteins to the  
181 surface of both FER2-replete and -depleted parasites (Fig. 4C, see Fig. S5A, B in the  
182 supplemental material). Thus, secretion of all micronemes is TgFER2 independent.

183           Surface antigen SAG1 and Mic8 were deposited in trails behind parasites ±ATc,  
184 implying that TgFER2-depleted parasites are still motile (see Fig. S5A, B in the  
185 supplemental material). This was confirmed by scoring the total number of motile  
186 parasites and the type of motility displayed by individual FER2 knockdown parasites by  
187 video microscopy (see Fig. S5C in the supplemental material). However, invading  
188 parasites, which are clearly identifiable by the stripping of Mic proteins off the apical  
189 invading parasite surface, were only observed in the presence of TgFER2 (Fig. 4C, see  
190 Fig. S5A in the supplemental material), suggesting an invasion defect independent of the  
191 micronemes.

192

193 **TgFER2 is required for host cell invasion.** We further examined host cell invasion of  
194 TgFER2-cKD mutants through a series of invasion and attachment assays. As controls,  
195 we used mutants with defects at different points of host cell attachment and/or invasion.  
196 These include the TgDOC2 temperature sensitive (*ts*-DOC2) mutant devoid of all  
197 microneme secretion (16), the calcineurin (CnA) mutant, which secretes micronemes but  
198 does not attach properly (11), the AMA1 mutant, which secretes micronemes but shows  
199 an increase in aborted invasions due to failures in functional MJ formation (31, 32), and



200 the DHHC7 mutant, which lacks the palmitoyltransferase responsible for anchoring the  
201 rhoptries at the apical end of the parasites and as a result is defective in rhoptry secretion  
202 (5).

203         Early events in parasite attachment are mediated by the binding of SAG proteins  
204 to glycans on the host cell surface. We assayed this by attachment of parasites to fixed  
205 host cells (29). Only the *ts*-DOC2 mutant demonstrated reduced attachment relative to the  
206 wild-type and uninduced controls, which indicates normal microneme secretion for all  
207 other mutants (Fig. 5A). Next we tested attachment and invasion by the “red-green  
208 invasion assay” (33). TgFER2 depleted parasites invaded at a much lower frequency (Fig.  
209 5B). The defect intensified >3-fold upon prolonged TgFER2 depletion (96 hrs), which  
210 importantly did not affect their viability as these parasites are still fully capable of egress  
211 (see Fig. S2 in the supplemental material). As expected, all other mutants showed severe  
212 invasion defects. In this assay, quantifying the total number of parasites per field allows  
213 for an estimation of parasite attachment. By this metric, a defect in the attachment of  
214 TgFER2-depleted parasites to host cells was observed. By 96 hr of knockdown, the  
215 numbers of parasites attached to host cells dropped nearly 4-fold (Fig. 5B). This  
216 approaches the levels observed in the *ts*-DOC2 mutant where attachment and invasion are  
217 both severely defective. The similarity between the *ts*-DOC2 mutant, where the primary  
218 defect is in attachment, and the DHHC7 mutant, with a primary invasion defect,  
219 highlights that this assay is unable to distinguish between these two interconnected  
220 phenotypes.

221         It has been observed that the motility and attachment dynamics of *Toxoplasma* are  
222 different under conditions of shear stress in a flow chamber (34). To investigate whether  
223 these conditions might better clarify the phenotype of the TgFER2 knockdown, we  
224 measured the ability of FER2-cKD parasites  $\pm$ ATc to adhere to human vascular  
225 endothelial cells (HUVEC) under flow. Depletion of TgFER2 led to a significant  
226 decrease in the number of parasites retained in the chamber (Fig. 5C and see Fig. S6 in  
227 the supplemental material), though attachment of TgFER2-depleted parasites was less  
228 compromised under flow relative to static conditions. This again demonstrates that  
229 TgFER2 is essential for invasion but does not pinpoint the nature of the defect. FER2-  
230 cKD parasites were then scrutinized for their interactions with host cells by video

231 microscopy. Both wild type and FER2-ckD parasites were able to glide across the host  
232 cells. In contrast to control parasites, TgFER2 depleted parasites were not able to invade  
233 host cells (Fig. 6 and see Movie S1 in the supplemental material). Surprisingly, FER2-  
234 ckD parasites still exhibited “impulse motility” characteristic of invading parasites (35).  
235 This typical burst of forward motion immediately preceding invasion is followed by a  
236 momentary pause when parasites secrete the RONs and create the MJ before proceeding  
237 with invasion and parasitophorous vacuole formation. Both control and induced FER2-  
238 ckD parasites displayed bursts of impulse motility followed by a pause. However, only  
239 in control -ATc parasites this pause was followed with forward motion (invasion) at  
240 approximately half the original speed. In contrast, the velocity of +ATc parasites dropped  
241 essentially to 0  $\mu\text{m}/\text{sec}$  and failed to invade. This observation suggests that TgFER2  
242 functions in the very late stages of invasion and indicates that either the MJ is not formed,  
243 or is not of sufficient strength to support the force required for parasite penetration into  
244 cells.

245

246 **TgFER2 is required for rhoptry secretion.** As shown in Fig. 3, 7 and S7 the  
247 localization and morphology of the rhoptries were not affected by TgFER2 depletion. To  
248 test rhoptry function, we first monitored the release of rhoptry neck proteins by tracking  
249 RON4 distribution and assaying MJ formation (Fig. 7A). In the non-induced control we  
250 readily observed MJ formation whereas no MJ formation was detected in absence of  
251 TgFER2. These data suggest that the RON proteins are not secreted, or if they are, they do  
252 not assemble into the MJ.

253 We next performed evacuole assays to determine the quantity and quality of  
254 rhoptry protein secretion in TgFER2 mutants. We used the AMA1-cKD as control for  
255 partial rhoptry secretion and weak MJ strength (31, 32) and DHHC7-cKD parasites as  
256 control for defective rhoptry secretion (5). Evacuoles, which are rhoptry protein clusters  
257 injected in the host cell cytosol, were visualized with ROP1 antiserum and classified as  
258 illustrated in Fig. 7B (32). To examine the strength of the overall parasite-host cell  
259 interaction the number of parasites per field was counted and differentiated by whether  
260 they were associated with an evacuole (Fig. 7C). The number of evacuoles per field and  
261 whether they are associated with parasites is a measure of the strength of the MJ (Fig.

262 7D). Levels of rhoptry secretion were differentiated by the relative size of evacuole  
263 patterns (Fig. 7E): small punctate ROP1 staining indicates less secretion than long trails  
264 or clusters. For FER2-ckD parasites, the number of parasites per field was consistent with  
265 the observations from the attachment and invasion assays: depletion of TgFER2  
266 decreased parasite attachment (Fig. 7C). Among the parasites that were attached, very  
267 few were associated with evacuoles, indicating that they have not secreted the contents of  
268 their rhoptries into the host cell. The TgFER2 data are comparable with the results for the  
269 DHHC7 mutant. However, they differed from parasites that lack AMA1, where few  
270 parasites attach but the majority of the parasites have secreted rhoptries and generated  
271 evacuoles. TgFER2-depleted parasites, like the DHHC7 mutant, appear to secrete very  
272 few, if any, rhoptries. When we assess how many of the observed evacuoles are  
273 associated with parasites it becomes clear that TgFER2 depletion is much more similar to  
274 DHHC7 depletion than to parasites lacking AMA1 (Fig. 7D). Finally, we observed  
275 relatively few extensive evacuole patterns for both TgFER2 and DHHC7-depleted  
276 parasites (Fig. 7E) and conclude that in the rare events of rhoptry secretion, very little  
277 material was released. Overall, we conclude that TgFER2 is required for the secretion of  
278 the rhoptries, which is necessary to invade host cells.

279  
280

## 281 **Discussion**

282 Micronemes and rhoptries are essential to the invasion of apicomplexan parasites. These  
283 fascinating cellular structures are likely derived from ancestral organelles that persist in  
284 modern predatory protozoa and were adapted during the evolution of the Apicomplexa's  
285 intracellular, parasitic lifestyle (9). While the molecular details of the initiation of  
286 microneme secretion are incompletely understood, the critical role of intracellular  $\text{Ca}^{2+}$   
287 fluxes has been known for decades. More recently, intermediate players in the  
288 transduction of this signal (e.g. CDPKs and calcineurin) have been identified and the  
289 unconventional trafficking of microneme contents through a modified endosomal system  
290 has been described (36, 37). Far less is known about either the mechanisms of rhoptry  
291 secretion or the trafficking of their contents.

292 It has long been hypothesized that secretion from both micronemes and/or  
293 rhoptries requires a membrane fusion event, but evidence for a canonical secretion  
294 machinery has been elusive. Using C2 domains as the anchor for a bioinformatic search  
295 for potential components of this pathway, we were unable to find homologs for either  
296 synaptotagmins or the canonical DOC2 family of  $\text{Ca}^{2+}$  sensors function in mammalian  
297 neurotransmitter release (23, 38). We did find orthologs of the ferlin family of  $\text{Ca}^{2+}$   
298 sensing membrane fusion proteins. TgFER1 and TgFER2 are widely conserved across the  
299 Apicomplexa, whereas the degenerate TgFER3 is found only in the Coccidia and a single  
300 Chromerid species, illustrative of the ancient history of these processes.

301 Detailed studies of *Toxoplasma* FER2 demonstrated it is required for secretion  
302 from the rhoptries. This finding provides one of the first mechanistic insights into rhoptry  
303 secretion, firmly linking it to the activity of this C2 domain-containing protein. It is  
304 generally accepted that rhoptry secretion must be preceded by microneme secretion and  
305 requires contact with an appropriate host cell (4, 8). However, neither the transduction of  
306 this attachment signal nor the process by which it leads to secretion of the organelle's  
307 contents have been clarified. Although it is known that Mic8 is required for rhoptry  
308 release and has been postulated to be key in a signal transduction pathway (39), there is  
309 no experimental data supporting this model. Furthermore, AMA1 (32) and RON5 (40)  
310 also appear to be involved in rhoptry secretion but these mechanisms are equally  
311 unknown. Our finding that the  $\text{Ca}^{2+}$  sensor TgFER2 is required for rhoptry secretion  
312 provides a tantalizing hint at a more detailed mechanism. Although we have not been  
313 able to definitively demonstrate a role for  $\text{Ca}^{2+}$  in TgFER2 function, ferlins are  $\text{Ca}^{2+}$ -  
314 sensing proteins and it is well established that a raise in  $[\text{Ca}^{2+}]_i$  accompanies host cell  
315 invasion (2). While the conventional belief has been that this fluctuation acted only on  
316 activation of motility, conoid extrusion and microneme secretion, we provide a hint that  
317 rhoptry secretion may be similarly dependent on variations in  $[\text{Ca}^{2+}]_i$ . The presence of an  
318 Asp residues constellation consistent with  $\text{Ca}^{2+}$ -binding capacity in TgFER2's C2F  
319 domain supports this model (see Fig S8 in the supplementary material), though the  
320 relative importance of the protein's individual C2 domains in this process remain to be  
321 experimentally determined.

322 Of the mammalian ferlins, otoferlin is currently the best studied, yet its

323 mechanism of action remains poorly understood (41). Otoferlin is expressed in many  
324 tissues, but in cochlear hair cells (CHCs) it controls the release of neurotransmitter upon  
325 an increase in  $[Ca^{2+}]_i$  (42, 43). A raise in  $[Ca^{2+}]_i$  leads otoferlin to interact with  
326 phospholipids (41) and SNARE proteins *in vitro* (44), though SNAREs have been  
327 debated to be absent from the site of secretion in CHCs (45). This highlights the potential  
328 for ferlin proteins to facilitate membrane fusion in the absence of SNAREs, an important  
329 parallel to *Toxoplasma*, in which there is currently no evidence for either rhoptry- or  
330 microneme-resident SNAREs. Otoferlin localizes to synaptic vesicles and the plasma  
331 membrane in CHCs (43). Our IEM observations on TgFER2 are consistent with a role in  
332 rhoptry secretion: in intracellular parasites TgFER2 localizes in a patchy pattern to the  
333 cytoplasmic side of the IMC next to a strong TgFER2 concentration inside the conoid; in  
334 extracellular parasites TgFER2 is detected in the conoid and surface of the rhoptries. This  
335 membrane transition is conceivable with  $Ca^{2+}$ -dependent process (e.g.  $Ca^{2+}$ -dependent  
336 phosphorylation (46)) and/or a change in membrane lipid composition of the IMC or  
337 rhoptry (e.g. as described for microneme secretion (47)).

338 As part of this study we compared different invasion and egress mutants across  
339 several commonly used assays, which allowed for several important observations. First,  
340 we observed that microneme protein mediated interactions are responsible for 50% of the  
341 attachment to fixed host cells. Somewhat unexpectedly, the red-green invasion assay did  
342 not differentiate the various mutants very well, with the exception of confirming the  
343 partial attachment defect previously demonstrated for the CnA mutant (11). Thus, this  
344 assay is not capable of specifically attributing individual phenotypes to defects in  
345 attachment versus invasion. By contrast, the evacuole assay was very powerful in  
346 differentiating different aspects of MJ formation and rhoptry secretion.

347 Overall, our findings support two interesting hypotheses. First, if ferlins act as  
348  $Ca^{2+}$ -sensors during  $Ca^{2+}$ -dependent secretion in the Apicomplexa, TgFER2 may  
349 represent the link between the previously observed  $Ca^{2+}$  fluctuations during invasion and  
350 the well-described mechanics of MJ formation. If on the other hand the essential role of  
351 TgFER2 during rhoptry secretion is calcium-independent, this would signify a fascinating  
352 evolutionary divergence from the canonical function of ferlins as  $Ca^{2+}$  sensors. While

353 additional work will be required to distinguish between these models, the work presented  
354 here is a critical step in our understanding of these critical virulence processes.

355

## 356 **Materials and Methods**

357

358 **Parasites and mammalian cell lines** Transgenic derivatives of the RH strain the were  
359 maintained in human foreskin fibroblasts (HFF) as previously described (48). For the  
360 attachment assay under fluidics shear stress, HUVEC were cultured in EGM-2 medium  
361 containing EGM-2 SingleQuot supplements and growth factors (Lonza, Allendal, NJ).  
362 TgFER2 CDS was amplified using primers YFP-FER2-F/R and *NheI/EcoRV* cloned into  
363 tub-YFPYFP(MCS)/sagCAT (49) to generate ptub-YFP-FER2/sagCAT which was used  
364 for Sanger sequencing validation of the gene model. FER2-cKD parasites were generated  
365 by *Bg/III/NotI* cloning PCR amplified FER2 sequence (primers BamHI-FER2-F/NotI-  
366 FER2-R) into N-terminal myc-epitope tagged plasmid derived from DHFR-TetO7sag4-  
367 Nt-GOI (Wassim Daher, Université de Montpellier) and linearized by *XbaI* prior to  
368 transfection. *ts*-DOC2 parasites were generated by first 5xTY tagging the DOC2 locus  
369 using PCR amplicon (primers 5xTy\_upstream\_F/5xTy\_PlusLink\_R) from plasmid pLIC-  
370 5xTY-DD24/HX (Chris Tonkin, Walter and Eliza Hall Institute) and *Bg/III/EcoRV*  
371 cloning into tub-YFPYFP(MCS)/sagCAT. The tub promoter was *PmeI/Bg/III* replaced  
372 with the 3' DOC2 homologous region PCR amplified from gDNA (primers DOC2\_3-  
373 target\_F/R). The CAT cassette was *PmeI/NotI* replaced with a DHFR minigene cassette  
374 and plasmid *NheI* linearized prior to transfection. A CRISPR/Cas9 plasmid was generated  
375 to mutate DOC2 F124 to S124 using primers DOC2\_proto\_F/R (50) and co-transfected  
376 with hybridized oligos DOC2\_FM>SV\_F/R in RHΔKu80ΔHX-DOC2-5xTY parasites.  
377 All primer sequences are provided in Table S1 in the supplemental material.

378

379 **Imaging** The following antisera were used:  $\alpha$ -Myc MAb 9E10,  $\alpha$ -SAG1 MAb DG52 (51),  
380  $\alpha$ -Mic2 MAb 6D10 (52), mouse  $\alpha$ -AMA1 (32), rabbit  $\alpha$ -Mic3 (29) rabbit  $\alpha$ -Mic5 (53),  
381 rabbit  $\alpha$ -Mic8 (54), and mouse  $\alpha$ -ROP1 (55). Alexa 488 or 594 conjugated secondary  
382 antibodies were used (Invitrogen). Images were collected on a Zeiss Axiovert 200 M

383 wide-field fluorescence microscope and images were deconvolved and adjusted for phase  
384 contrast using Volocity software (Perkin Elmer).

385

386 **Egress assay** Assayed as described previously (11, 16). Freshly lysed, parasites, pre-  
387 treated  $\pm$ ATc for 24 hr were inoculated in HFF cells and incubated  $\pm$ ATc for additional  
388 24 hr. For 96 hr, parasites treated  $\pm$ ATc for 68 hr were inoculated and incubated  $\pm$ ATc  
389 for additional 30 hr. Egress was triggered by treatment with 2  $\mu$ M A23187 or DMSO at  
390 37°C for 5 min, followed by IFA with rat  $\alpha$ -IMC3 (49). Intact vacuoles were counted for  
391 each sample in at least 10 fields and percentage egress calculated relative to the DMSO  
392 control

393

394 **Attachment and invasion** The combined attachment/invasion assay was performed as  
395 previously published (16, 33) with modifications described in (11): Tachyzoites treated  
396  $\pm$ ATc for the hrs as indicated (*ts*-DOC2 parasites incubated at 35°C and 40°C) were  
397 added to host cells in a 96-well plate, centrifuged (28\*g, 3 min, RT), and allowed to  
398 invade for 1 hr at 37°C. Non-invaded extracellular parasites were detected using A594  
399 conjugated  $\alpha$ -SAG1 T41E5 (56). Following fixation and permeabilization, all parasites  
400 were visualized with A488 conjugated  $\alpha$ -SAG1 T41E5. At least 300 parasites were  
401 counted per sample.

402

403 **Attachment to fixed host cells** Assay was performed as previously described (32). HFF  
404 confluent 96 well optical bottom plates were fixed with 3% formaldehyde + 0.06%  
405 glutaraldehyde for 5 min at 4°C, followed by overnight 0.16 M ethanolamine quenching  
406 at 4°C. Wells were pre-rinsed with 0.2% BSA in DMEM. Cytoplasmic YFP expressing  
407 TATi $\Delta$ Ku80 parasites mixed in 1:1 ratio were used as internal control (11), centrifuged  
408 (28\*g, 5 min, 20°C) on the monolayer and incubated for 30 min at 37°C. Wells were  
409 rinsed 3 times with PBS, fixed with 4% PFA for 30 min at 4°C and permeabilized with  
410 0.25% TX-100 for 10 min. After blocking with 1% BSA in PBS, the parasites were  
411 probed with rabbit  $\alpha$ -GFP (Torrey Pines Biolabs), and mouse  $\alpha$ -SAG1 DG52. Three  
412 random fields in 3 independent wells were counted.

413

414 **Attachment under fluidics shear stress** was performed as described previously (34, 57).  
415 Microfluidic channels containing fibronectin were coated overnight with HUVEC.  
416 Freshly lysed parasites treated  $\pm$ ATc for 48 or 96 hr were either stained with CMTPIX  
417 CellTracker red or CFSE (Life Technologies), counted and combined 1:1. In each  
418 replicate experiment, the dyes were switched on the parental and knock-down parasite  
419 lines. Parasites were flowed at a shear force of 0.5 dyne/cm<sup>2</sup> for 10 min at 37°C, and  
420 were fixed under flow conditions with 4% PFA for 30 min, followed by imaging on a  
421 Nikon Eclipse Ti microscope.

422

423 **Conoid extrusion assay** was performed as published (26). Freshly lysed parasites grown  
424  $\pm$ ATc for 48 hr were resuspended in 10% FBS in HS buffer. Conoid extrusion was  
425 induced using 0.5 M ethanol or 5  $\mu$ M A23187 for 30 seconds. Parasites were fixed and  
426 scored for conoid extrusion by phase contrast microscopy. Samples were counted blindly  
427 scoring more than 350 parasites per sample.

428

429 **Microneme Mic2, Mic8, Mic10 secretion by western blot** was performed as published  
430 (30). Freshly lysed parasites treated  $\pm$ ATc for 48 hr, resuspended in DMEM/FBS were  
431 added to a 96-well round-bottom plate and secretion induced by 1  $\mu$ M A23187 or DMSO  
432 for 5 min at 37°C. Constitutive microneme secretion: no stimulation 37°C for 60 min.  
433 Supernatants were probed by western blot using MAb 6D10  $\alpha$ -Mic2 (52), rabbit  $\alpha$ -Mic8  
434 (54), rabbit  $\alpha$ -Mic10 (58), and MAb  $\alpha$ -Gra1 (59). Signals were quantified using a  
435 densitometer.

436

437 **Microneme Mic3, Mic5, Mic8 secretion by IFA** Mic3 (29), Mic5 (53), or Mic8 (54)  
438 IFA on parasites exposed to a host cell monolayer was performed as published (30).  
439 Parasites resuspended in Endo buffer were spun onto HFF cells in a 6-well plate (28\*g, 5  
440 min, RT) and incubated at 37°C for 20 min. Endo buffer was replaced by DMEM, 3%  
441 FBS and 10 mM HEPES pH7.2 and incubated at 37°C for 5 min. PBS washed coverslips  
442 were fixed with 4% formaldehyde / 0.02% glutaraldehyde followed by IFA in the  
443 presence of 0.02% saponin.

444



445 **Motility assessments** Motility was analyzed by video microscopy essentially as  
446 described previously (16). Intracellular tachyzoites grown for 96 hr  $\pm$ ATc were  
447 physically harvested and resuspended in modified Ringer's Medium and added to HFF  
448 confluent glass-bottom culture dishes (MatTek). The dish was imaged using a 63x  
449 objective at 37°C. Videos were recorded with 1 sec intervals. Velocities of individual  
450 invasion events were analyzed using the ImageJ/FIJI Cell Counter plug-in.

451

452 **Moving Junction (MJ) formation** was determined as published (39) with described  
453 modifications (11). Parasites grown  $\pm$ ATc for 48 hr were inoculated into a HFF-confluent  
454 24-well plate by centrifugation (28, 5 min, 20°C) and incubation at 37°C for 10 min.  
455 Wells were rinsed twice with PBS and fixed with 4% PFA at 4°C and partly  
456 permeabilized with 0.02% saponin. MJ was detected using rabbit  $\alpha$ -RON4 (7) and all  
457 parasites were detected following full permeabilization with using MAb  $\alpha$ -SAG1 DG52.

458

459 **Evacuole assay** Evacuoles were determined as described (60) with modifications.  $1 \times 10^7$   
460 parasites grown  $\pm$ ATc for 48 hr were inoculated into HFF confluent 24-well plates. The  
461 plate was centrifuged (28\*g, 15 min, 23°C) and incubated at 37°C for 10 min. Wells were  
462 rinsed twice with PBS and fixed with 4% PFA at 4°C and 0.25% TX-100 permeabilized.  
463 Evacuoles were detected by MAb Tg49  $\alpha$ -ROP1 (55). More than 100 events per sample  
464 per experiment were counted.

465

466 **Immuno electron microscopy** Following washing with PBS, overnight infected HFF  
467 cells were fixed in 4% PFA in 0.25 M HEPES (pH 7.4) for 1 hr at RT, then in 8% PFA in  
468 the same buffer overnight at 4°C. They were infiltrated, frozen and sectioned as  
469 previously described (61). Sections were immunolabeled with  $\alpha$ -Myc 9E10 in 1% fish  
470 skin gelatin, then with goat  $\alpha$ -IgG antibodies, followed by 10 nm protein A-gold particles  
471 before examination with a Philips CM120 electron microscope under 80 kV.

472

473 **Transmission electron microscopy** Parasites were fixed in 4% glutaraldehyde in 0.1 M  
474 phosphate buffer pH 7.4 and processed for routine electron microscopy (62). Briefly,  
475 cells were post-fixed in osmium tetroxide, and treated with uranyl acetate prior to

476 dehydration in ethanol, treatment with propylene oxide, and embedding in Spurr's epoxy  
477 resin. Thin sections were stained with uranyl acetate and lead citrate prior to examination  
478 with a JEOL 1200EX electron microscope.

479

480 **Statistics** Student's paired *t*-test and one-way ANOVA using posthoc Bonferroni  
481 correction were used where indicated against the TaTiΔKu80 line.

482

### 483 **Acknowledgements**

484 We thank Dr. Jamie Henzy for assistance with phylogenetic analysis, Dr. Sander  
485 Groffen for assistance with modeling, Amir Bayegan for assistance with statistics,  
486 Elizabeth C. Gray for technical assistance, Drs. Bradley, Boothroyd, Carruthers, Cesbron-  
487 Delauw, Daher, de Graffenried, Dubremetz, Saeij, Sibley, Soldati, Striepen, Tonkin, and  
488 Ward for sharing reagents, and Dr Manoj Duraisingh for critically reading the manuscript.  
489 We would also like to thank the technical competence of Kimberley Zichichi from the  
490 Electron Microscopy Facility at Yale University.

491 This study was supported by NIH AI108251 (BIC), AI060767 (IC), AI099658 (MJG),  
492 and AI122923 (MJG), Deutsche Forschungsgemeinschaft (KE), American Cancer  
493 Society 126688-RSG-14-202-01-MPC (MBL) and American Cancer Society RSG-12-  
494 175-01-MPC (MJG). The funders had no role in study design, data collection and  
495 analysis, decision to publish, or preparation of the manuscript.

496 **References**

497

- 498 1. Kafsack BF, Pena JD, Coppens I, Ravindran S, Boothroyd JC, Carruthers VB.  
499 2009. Rapid membrane disruption by a perforin-like protein facilitates parasite  
500 exit from host cells. *Science* 323:530-3.
- 501 2. Wetzel DM, Chen LA, Ruiz FA, Moreno SN, Sibley LD. 2004. Calcium-  
502 mediated protein secretion potentiates motility in *Toxoplasma gondii*. *J Cell Sci*  
503 117:5739-48.
- 504 3. Carruthers VB, Tomley FM. 2008. Microneme proteins in apicomplexans.  
505 *Subcell Biochem* 47:33-45.
- 506 4. Carruthers V, Boothroyd JC. 2007. Pulling together: an integrated model of  
507 *Toxoplasma* cell invasion. *Curr Opin Microbiol* 10:83-9.
- 508 5. Beck JR, Fung C, Straub KW, Coppens I, Vashisht AA, Wohlschlegel JA,  
509 Bradley PJ. 2013. A *Toxoplasma* palmitoyl acyl transferase and the palmitoylated  
510 Armadillo Repeat protein TgARO govern apical rhoptry tethering and reveal a  
511 critical role for the rhoptries in host cell invasion but not egress. *PLoS Pathog*  
512 9:e1003162.
- 513 6. Bradley PJ, Sibley LD. 2007. Rhoptries: an arsenal of secreted virulence factors.  
514 *Curr Opin Microbiol* 10:582-7.
- 515 7. Alexander DL, Mital J, Ward GE, Bradley P, Boothroyd JC. 2005. Identification  
516 of the Moving Junction Complex of *Toxoplasma gondii*: A Collaboration between  
517 Distinct Secretory Organelles. *PLoS Pathog* 1:e17.
- 518 8. Carruthers VB, Sibley LD. 1997. Sequential protein secretion from three distinct  
519 organelles of *Toxoplasma gondii* accompanies invasion of human fibroblasts. *Eur*  
520 *J Cell Biol* 73:114-23.
- 521 9. Gubbels MJ, Duraisingh MT. 2012. Evolution of apicomplexan secretory  
522 organelles. *Int J Parasitol* 42:1071-81.
- 523 10. Mercier C, Cesbron-Delauw MF. 2015. *Toxoplasma* secretory granules: one  
524 population or more? *Trends Parasitol* doi:10.1016/j.pt.2014.12.002.
- 525 11. Paul AS, Saha S, Engelberg K, Jiang RH, Coleman BI, Kosber AL, Chen CT,  
526 Ganter M, Espy N, Gilberger TW, Gubbels MJ, Duraisingh MT. 2015. Parasite

- 527 Calcineurin Regulates Host Cell Recognition and Attachment by Apicomplexans.  
528 Cell Host Microbe 18:49-60.
- 529 12. Lourido S, Shuman J, Zhang C, Shokat KM, Hui R, Sibley LD. 2010. Calcium-  
530 dependent protein kinase 1 is an essential regulator of exocytosis in Toxoplasma.  
531 Nature 465:359-62.
- 532 13. Garrison E, Treeck M, Ehret E, Butz H, Garbuz T, Oswald BP, Settles M,  
533 Boothroyd J, Arrizabalaga G. 2012. A forward genetic screen reveals that  
534 calcium-dependent protein kinase 3 regulates egress in Toxoplasma. PLoS Pathog  
535 8:e1003049.
- 536 14. Lourido S, Tang K, Sibley LD. 2012. Distinct signalling pathways control  
537 Toxoplasma egress and host-cell invasion. Embo J 31:4524-34.
- 538 15. McCoy JM, Whitehead L, van Dooren GG, Tonkin CJ. 2012. TgCDPK3  
539 Regulates Calcium-Dependent Egress of Toxoplasma gondii from Host Cells.  
540 PLoS Pathog 8:e1003066.
- 541 16. Farrell A, Thirugnanam S, Lorestani A, Dvorin JD, Eidell KP, Ferguson DJ,  
542 Anderson-White BR, Duraisingh MT, Marth GT, Gubbels MJ. 2012. A DOC2  
543 protein identified by mutational profiling is essential for apicomplexan parasite  
544 exocytosis. Science 335:218-21.
- 545 17. Martens S, McMahon HT. 2008. Mechanisms of membrane fusion: disparate  
546 players and common principles. Nat Rev Mol Cell Biol 9:543-56.
- 547 18. Martens S. 2010. Role of C2 domain proteins during synaptic vesicle exocytosis.  
548 Biochem Soc Trans 38:213-6.
- 549 19. Lek A, Lek M, North KN, Cooper ST. 2010. Phylogenetic analysis of ferlin genes  
550 reveals ancient eukaryotic origins. BMC Evol Biol 10:231.
- 551 20. Lek A, Evesson FJ, Sutton RB, North KN, Cooper ST. 2012. Ferlins: regulators  
552 of vesicle fusion for auditory neurotransmission, receptor trafficking and  
553 membrane repair. Traffic 13:185-94.
- 554 21. Pang ZP, Sudhof TC. 2010. Cell biology of Ca<sup>2+</sup>-triggered exocytosis. Curr Opin  
555 Cell Biol 22:496-505.
- 556 22. Sudhof TC. 2013. A molecular machine for neurotransmitter release:  
557 synaptotagmin and beyond. Nat Med 19:1227-31.

- 558 23. Walter AM, Groffen AJ, Sorensen JB, Verhage M. 2011. Multiple Ca<sup>2+</sup> sensors  
559 in secretion: teammates, competitors or autocrats? *Trends Neurosci* 34:487-97.
- 560 24. Woo YH, Ansari H, Otto TD, Klinger CM, Kolisko M, Michalek J, Saxena A,  
561 Shanmugam D, Tayyrov A, Veluchamy A, Ali S, Bernal A, Del Campo J, Cihlar J,  
562 Flegontov P, Gornik SG, Hajduskova E, Horak A, Janouskovec J, Katris NJ, Mast  
563 FD, Miranda-Saavedra D, Mourier T, Naeem R, Nair M, Panigrahi AK, Rawlings  
564 ND, Padron-Regalado E, Ramaprasad A, Samad N, Tomcala A, Wilkes J,  
565 Neafsey DE, Doerig C, Bowler C, Keeling PJ, Roos DS, Dacks JB, Templeton TJ,  
566 Waller RF, Lukes J, Obornik M, Pain A. 2015. Chromerid genomes reveal the  
567 evolutionary path from photosynthetic algae to obligate intracellular parasites.  
568 *Elife* 4.
- 569 25. Meissner M, Schluter D, Soldati D. 2002. Role of *Toxoplasma gondii* myosin A  
570 in powering parasite gliding and host cell invasion. *Science* 298:837-40.
- 571 26. Mondragon R, Frixione E. 1996. Ca<sup>2+</sup>-dependence of conoid extrusion in  
572 *Toxoplasma gondii* tachyzoites. *J Eukaryot Microbiol* 43:120-7.
- 573 27. Carruthers VB, Moreno SN, Sibley LD. 1999. Ethanol and acetaldehyde elevate  
574 intracellular [Ca<sup>2+</sup>] and stimulate microneme discharge in *Toxoplasma gondii*.  
575 *Biochem J* 342 ( Pt 2):379-86.
- 576 28. Kremer K, Kamin D, Rittweger E, Wilkes J, Flammer H, Mahler S, Heng J,  
577 Tonkin CJ, Langsley G, Hell SW, Carruthers VB, Ferguson DJ, Meissner M.  
578 2013. An overexpression screen of *Toxoplasma gondii* Rab-GTPases reveals  
579 distinct transport routes to the micronemes. *PLoS Pathog* 9:e1003213.
- 580 29. Garcia-Reguet N, Lebrun M, Fourmaux MN, Mercereau-Puijalon O, Mann T,  
581 Beckers CJ, Samyn B, Van Beeumen J, Bout D, Dubremetz JF. 2000. The  
582 microneme protein MIC3 of *Toxoplasma gondii* is a secretory adhesin that binds  
583 to both the surface of the host cells and the surface of the parasite. *Cell Microbiol*  
584 2:353-64.
- 585 30. Carruthers VB, Sibley LD. 1999. Mobilization of intracellular calcium stimulates  
586 microneme discharge in *Toxoplasma gondii*. *Mol Microbiol* 31:421-8.
- 587 31. Lamarque MH, Roques M, Kong-Hap M, Tonkin ML, Rugarabamu G, Marq JB,  
588 Penarete-Vargas DM, Boulanger MJ, Soldati-Favre D, Lebrun M. 2014. Plasticity

- 589 and redundancy among AMA-RON pairs ensure host cell entry of *Toxoplasma*  
590 parasites. *Nat Commun* 5:4098.
- 591 32. Mital J, Meissner M, Soldati D, Ward GE. 2005. Conditional Expression of  
592 *Toxoplasma gondii* Apical Membrane Antigen-1 (TgAMA1) Demonstrates That  
593 TgAMA1 Plays a Critical Role in Host Cell Invasion. *Mol Biol Cell* 16:4341-9.
- 594 33. Carey KL, Westwood NJ, Mitchison TJ, Ward GE. 2004. A small-molecule  
595 approach to studying invasive mechanisms of *Toxoplasma gondii*. *Proc Natl Acad*  
596 *Sci U S A* 101:7433-8.
- 597 34. Harker KS, Jivan E, McWhorter FY, Liu WF, Lodoen MB. 2014. Shear forces  
598 enhance *Toxoplasma gondii* tachyzoite motility on vascular endothelium. *mBio*  
599 5:e01111-13.
- 600 35. Bichet M, Joly C, Hadj Henni A, Guilbert T, Xemard M, Tafani V, Lagal V,  
601 Charras G, Tardieux I. 2014. The toxoplasma-host cell junction is anchored to the  
602 cell cortex to sustain parasite invasive force. *BMC Biol* 12:773.
- 603 36. Sangare LO, Alayi TD, Westermann B, Hovasse A, Sindikubwabo F, Callebaut I,  
604 Werkmeister E, Lafont F, Slomianny C, Hakimi MA, Van Dorsselaer A,  
605 Schaeffer-Reiss C, Tomavo S. 2016. Unconventional endosome-like compartment  
606 and retromer complex in *Toxoplasma gondii* govern parasite integrity and host  
607 infection. *Nat Commun* 7:11191.
- 608 37. Tomavo S. 2014. Evolutionary repurposing of endosomal systems for apical  
609 organelle biogenesis in *Toxoplasma gondii*. *Int J Parasitol* 44:133-8.
- 610 38. Shin OH. 2014. Exocytosis and synaptic vesicle fusion. *Comprehensive*  
611 *Physiology* 4:149-175.
- 612 39. Kessler H, Herm-Gotz A, Hegge S, Rauch M, Soldati-Favre D, Frischknecht F,  
613 Meissner M. 2008. Microneme protein 8--a new essential invasion factor in  
614 *Toxoplasma gondii*. *J Cell Sci* 121:947-56.
- 615 40. Beck JR, Chen AL, Kim EW, Bradley PJ. 2014. RON5 is critical for organization  
616 and function of the *Toxoplasma* moving junction complex. *PLoS Pathog*  
617 10:e1004025.
- 618 41. Pangrsic T, Reisinger E, Moser T. 2012. Otoferlin: a multi-C2 domain protein  
619 essential for hearing. *Trends in neurosciences* 35:671-80.

- 620 42. Roux I, Safieddine S, Nouvian R, Grati M, Simmler MC, Bahloul A, Perfettini I,  
621 Le Gall M, Rostaing P, Hamard G, Triller A, Avan P, Moser T, Petit C. 2006.  
622 Otoferlin, defective in a human deafness form, is essential for exocytosis at the  
623 auditory ribbon synapse. *Cell* 127:277-89.
- 624 43. Pangrsic T, Lasarow L, Reuter K, Takago H, Schwander M, Riedel D, Frank T,  
625 Tarantino LM, Bailey JS, Strenzke N, Brose N, Muller U, Reisinger E, Moser T.  
626 2010. Hearing requires otoferlin-dependent efficient replenishment of synaptic  
627 vesicles in hair cells. *Nat Neurosci* 13:869-76.
- 628 44. Johnson CP, Chapman ER. 2010. Otoferlin is a calcium sensor that directly  
629 regulates SNARE-mediated membrane fusion. *J Cell Biol* 191:187-97.
- 630 45. Nouvian R, Neef J, Bulankina AV, Reisinger E, Pangrsic T, Frank T, Sikorra S,  
631 Brose N, Binz T, Moser T. 2011. Exocytosis at the hair cell ribbon synapse  
632 apparently operates without neuronal SNARE proteins. *Nat Neurosci* 14:411-3.
- 633 46. Meese S, Cepeda AP, Gahlen F, Adams CM, Ficner R, Ricci AJ, Heller S,  
634 Reisinger E, Herget M. 2017. Activity-Dependent Phosphorylation by  
635 CaMKII $\delta$  Alters the Ca<sup>2+</sup> Affinity of the Multi-C2-Domain Protein  
636 Otoferlin. *Front Synaptic Neurosci* 9:13.
- 637 47. Bullen HE, Jia Y, Yamaro-Botte Y, Bisio H, Zhang O, Jemelin NK, Marq JB,  
638 Carruthers V, Botte CY, Soldati-Favre D. 2016. Phosphatidic Acid-Mediated  
639 Signaling Regulates Microneme Secretion in *Toxoplasma*. *Cell Host Microbe*  
640 19:349-60.
- 641 48. Roos DS, Donald RG, Morrisette NS, Moulton AL. 1994. Molecular tools for  
642 genetic dissection of the protozoan parasite *Toxoplasma gondii*. *Methods Cell*  
643 *Biol* 45:27-63.
- 644 49. Anderson-White BR, Ivey FD, Cheng K, Szatanek T, Lorestani A, Beckers CJ,  
645 Ferguson DJ, Sahoo N, Gubbels MJ. 2011. A family of intermediate filament-like  
646 proteins is sequentially assembled into the cytoskeleton of *Toxoplasma gondii*.  
647 *Cell Microbiol* 13:18-31.
- 648 50. Sidik SM, Hackett CG, Tran F, Westwood NJ, Lourido S. 2014. Efficient genome  
649 engineering of *Toxoplasma gondii* using CRISPR/Cas9. *PLoS ONE* 9:e100450.

- 650 51. Burg JL, Perelman D, Kasper LH, Ware PL, Boothroyd JC. 1988. Molecular  
651 analysis of the gene encoding the major surface antigen of *Toxoplasma gondii*.  
652 *Journal of immunology* 141:3584-91.
- 653 52. Wan KL, Carruthers VB, Sibley LD, Ajioka JW. 1997. Molecular characterisation  
654 of an expressed sequence tag locus of *Toxoplasma gondii* encoding the  
655 micronemal protein MIC2. *Mol Biochem Parasitol* 84:203-14.
- 656 53. Brydges SD, Zhou XW, Huynh MH, Harper JM, Mital J, Adjogble KD, Daubener  
657 W, Ward GE, Carruthers VB. 2006. Targeted deletion of MIC5 enhances  
658 trimming proteolysis of *Toxoplasma* invasion proteins. *Eukaryot Cell* 5:2174-83.
- 659 54. Meissner M, Reiss M, Viebig N, Carruthers VB, Torsel C, Tomavo S, Ajioka  
660 JW, Soldati D. 2002. A family of transmembrane microneme proteins of  
661 *Toxoplasma gondii* contain EGF-like domains and function as escorts. *J Cell*  
662 *Sci* 115:563-74.
- 663 55. Saffer LD, Mercereau-Puijalon O, Dubremetz JF, Schwartzman JD. 1992.  
664 Localization of a *Toxoplasma gondii* rhoptry protein by immunoelectron  
665 microscopy during and after host cell penetration. *J Protozool* 39:526-30.
- 666 56. Couvreur G, Sadak A, Fortier B, Dubremetz JF. 1988. Surface antigens of  
667 *Toxoplasma gondii*. *Parasitology* 97 ( Pt 1):1-10.
- 668 57. Ueno N, Harker KS, Clarke EV, McWhorter FY, Liu WF, Tenner AJ, Lodoen  
669 MB. 2014. Real-time imaging of *Toxoplasma*-infected human monocytes under  
670 fluidic shear stress reveals rapid translocation of intracellular parasites across  
671 endothelial barriers. *Cell Microbiol* 16:580-95.
- 672 58. Hoff EF, Cook SH, Sherman GD, Harper JM, Ferguson DJ, Dubremetz JF,  
673 Carruthers VB. 2001. *Toxoplasma gondii*: molecular cloning and characterization  
674 of a novel 18-kDa secretory antigen, TgMIC10. *Exp Parasitol* 97:77-88.
- 675 59. Cesbron-Delauw MF, Guy B, Torpier G, Pierce RJ, Lenzen G, Cesbron JY,  
676 Charif H, Lepage P, Darcy F, Lecocq JP. 1989. Molecular characterization of a  
677 23-kilodalton major antigen secreted by *Toxoplasma gondii*. *Proc Natl Acad Sci*  
678 *U S A* 86:7537-41.



- 679 60. Hakansson S, Charron AJ, Sibley LD. 2001. Toxoplasma evacuoles: a two-step  
680 process of secretion and fusion forms the parasitophorous vacuole. *Embo J*  
681 20:3132-44.
- 682 61. Folsch H, Pypaert M, Schu P, Mellman I. 2001. Distribution and function of AP-1  
683 clathrin adaptor complexes in polarized epithelial cells. *J Cell Biol* 152:595-606.
- 684 62. Ferguson DJ, Cesbron-Delauw MF, Dubremetz JF, Sibley LD, Joiner KA, Wright  
685 S. 1999. The expression and distribution of dense granule proteins in the enteric  
686 (Coccidian) forms of *Toxoplasma gondii* in the small intestine of the cat. *Exp*  
687 *Parasitol* 91:203-11.
- 688 63. Kearse M, Moir R, Wilson A, Stones-Havas S, Cheung M, Sturrock S, Buxton S,  
689 Cooper A, Markowitz S, Duran C, Thierer T, Ashton B, Meintjes P, Drummond  
690 A. 2012. Geneious Basic: an integrated and extendable desktop software platform  
691 for the organization and analysis of sequence data. *Bioinformatics* 28:1647-9.  
692

693 **Figure 1**

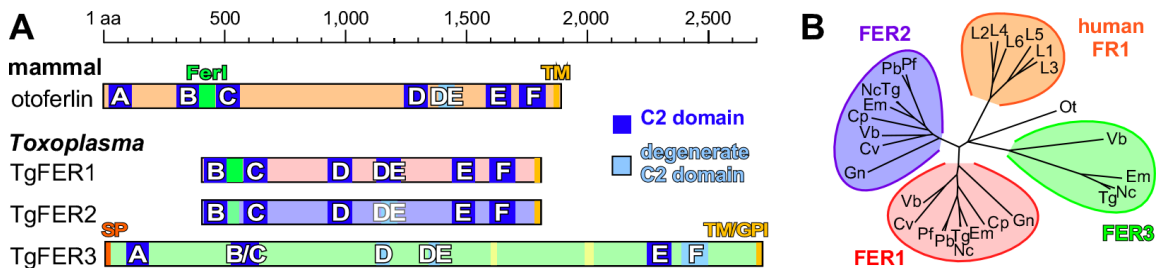

694

695

696 **FIG 1 (A)** *Toxoplasma* encodes three ferlin proteins and human otoferlin is shown for  
 697 comparison. Ferlins are defined by 5 to 7 C2 domains (labeled A-F) and a C-terminal  
 698 transmembrane (TM) domain and typically a ‘Fer1’ domain of unknown function.

699 TgFER3 contains an N-terminal signal peptide, which, in combination with the C-  
 700 terminal TM domain, could signal GPI-anchor addition at the C-terminus. Yellow shades  
 701 in TgFER3 represent coiled-coil domains. **(B)** Phylogenetic analysis of apicomplexan,  
 702 chromerid and human ferlins. The following abbreviations are used: human ferlins “L1-  
 703 L5” FR1L1-5 (FR1L1 (dysferlin; O75923.1), FR1L2 (otoferlin; Q9HC10.3), FR1L3  
 704 (myoferlin; Q9NZM1.1), FR1L4 (A9Z1Z3.1), FR1L5 (A0AVI2.2), FR1L6 (Q2WVGJ9.2)),  
 705 Ot: green algae *Ostreococcus tauri* (Q01FJ7); Chromerids “Vb” *Vitrella brassicaformis*  
 706 (VbFER1 (Vbre\_12074 + Vbra\_12075), VbFER2 (Vbra\_9198)) and “Cv” *Chromera*  
 707 *velia* (CvFER1 (Cvel\_17519.2) and CvFER2 (Cvel\_9223)); Apicomplexa “Tg”  
 708 *Toxoplasma gondii* (TgFER1 (TGME49\_309420), TgFER2 (TGME49\_260470),  
 709 TgFER3 (TGME49\_295472 + TGME49\_295468)) “Nc”, *Neospora caninum* (NcFER1  
 710 (NCLIV\_053770), NcFER2 (NCLIV\_026570), NcFER3 (NCLIV\_002280)), “Em”  
 711 *Eimeria maxima* (EmFER1 (EMWEY\_00002120), EmFER2 (EMWEY\_00009280),  
 712 EmFER3 (EMWEY\_00017650)), “Pf” *Plasmodium falciparum* (PfFER1  
 713 (PF3D7\_0806300), PfFER2 (PF3D7\_1455600)), “Pb” *Plasmodium berghei* (PbFER1  
 714 (PBANKA\_122440), PbFER2 (PBANKA\_131930)), “Cp” *Cryptosporidium parvum*  
 715 (CpFER1 (cgd8\_2910), CpFER2 (cgd2\_2320)), “Gn” *Gregarina niphandrodes* (GnFER1  
 716 (GNI\_063830), and GnFER2 (GNI\_073830)). Alignment and unrooted Jules-Cantor  
 717 phylogenetic tree were generated in Geneious (v.6.1.6) (63)) from a MUSCLE alignment  
 718 using neighbor-joining. Note that the FER1 and FER2 nodes for Tg and Nc are barely  
 719 discernable at this scale.

720 **Figure 2**

721

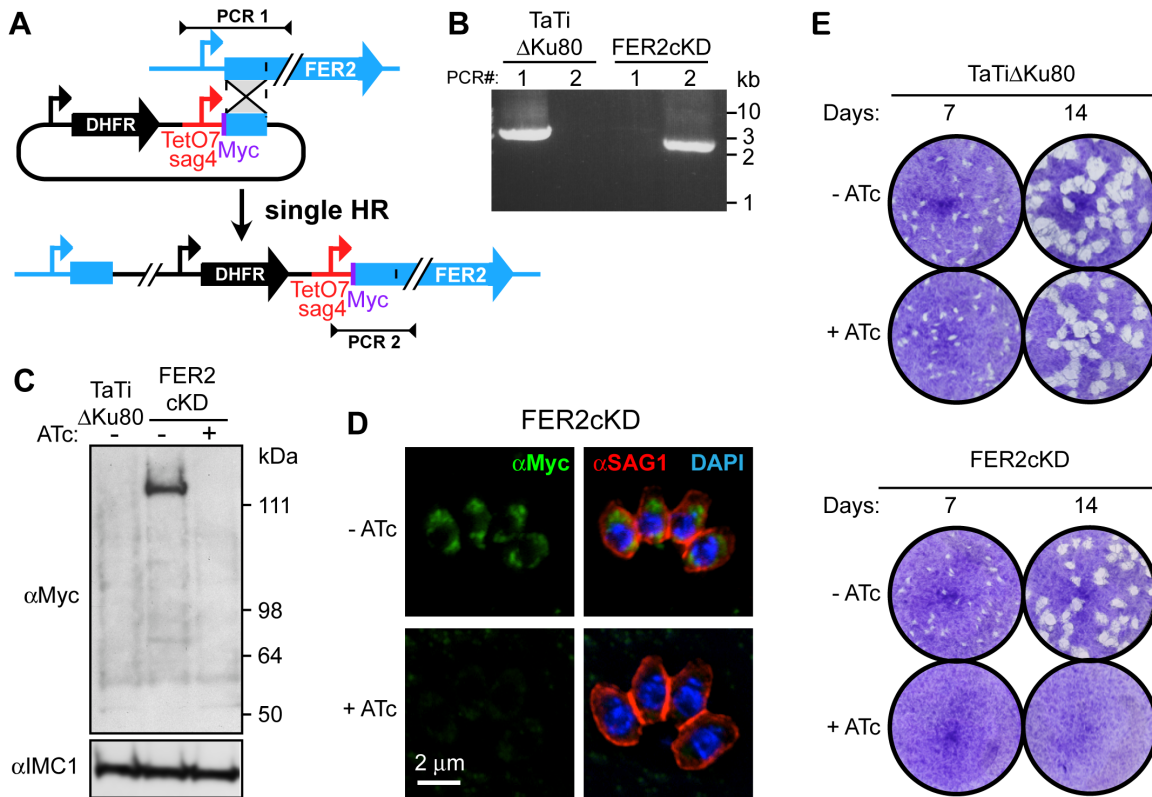

722

723

724 **FIG 2** Generation and validation of a TgFER2 conditional knock-down parasite. **(A)**  
 725 Schematic representation of single homologous promoter replacement with the anhydrous  
 726 tetracycline (ATc) regulatable promoter TetO7sag4. Note that a Myc-epitope tag is  
 727 simultaneously added on the N-terminus. Sites of diagnostic primer pairs used in panel B  
 728 are indicated. **(B)** Diagnostic PCR of the parent line (TaTiΔKu80) and the FER2-ckD  
 729 promoter replacement line using the primer pairs depicted in panel A. **(C)** Western blot  
 730 demonstrating the conditional expression of the Myc-tagged TgFER2 allele. TgFER2 is  
 731 downregulated to undetectable levels after 48 hr of ATc treatment. α-IMC1 is used as a  
 732 loading control. **(D)** Immunofluorescence demonstrating the loss of Myc-TgFER2  
 733 expression upon ATc treatment for 20 hr. Parasites were fixed with 100% methanol.  
 734 DAPI labels DNA and α-SAG1 marks the plasma membrane. **(e)** Plaque assays of parent  
 735 (TaTiΔKu80) and FER2-ckD lines ±ATc treatment for times as indicated. No plaques are  
 736 observed upon loss of TgFER2 expression.

737 **Figure 3**

738

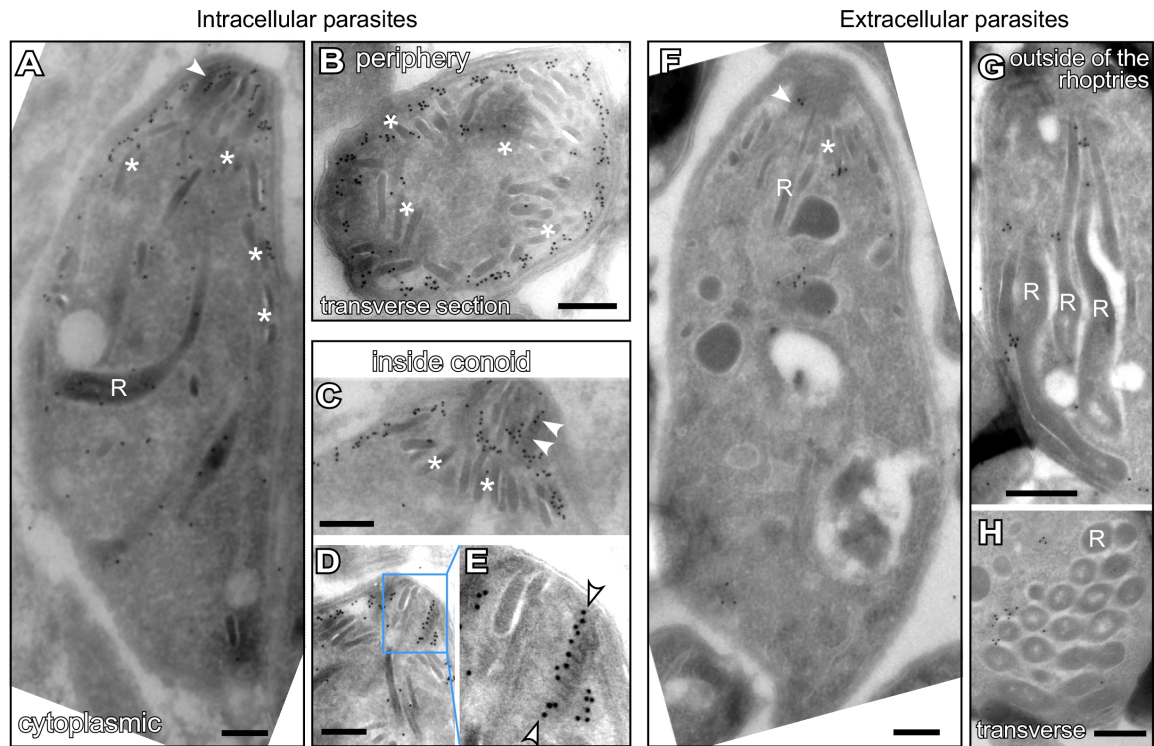

739

740

741 **FIG 3** Subcellular localization of TgFER2. Immunoelectron microscopy of intracellular  
742 (A-D) and extracellular (F-H) *Toxoplasma* tachyzoites expressing an N-terminal Myc-  
743 epitope tagged TgFER2 from the endogenous locus under the TetO7sag4 promoter. In  
744 Intracellular parasites Myc antibodies direct gold particle clusters to the cytoplasmic side  
745 of the IMC and a strong enrichment inside the conoid, but no strong association with  
746 either micronemes and minor association with the rhoptries. In extracellular parasites  
747 gold particles are predominantly observed in clusters on the cytoplasmic side of the  
748 rhoptry membranes next to localization inside the conoid. R marks the rhoptries; asterisks  
749 mark micronemes, arrowheads mark gold beads in the conoid. Panel E is a magnification  
750 of the region marked in panel D. Scale bars are 250 nm.

751

752 **Figure 4**

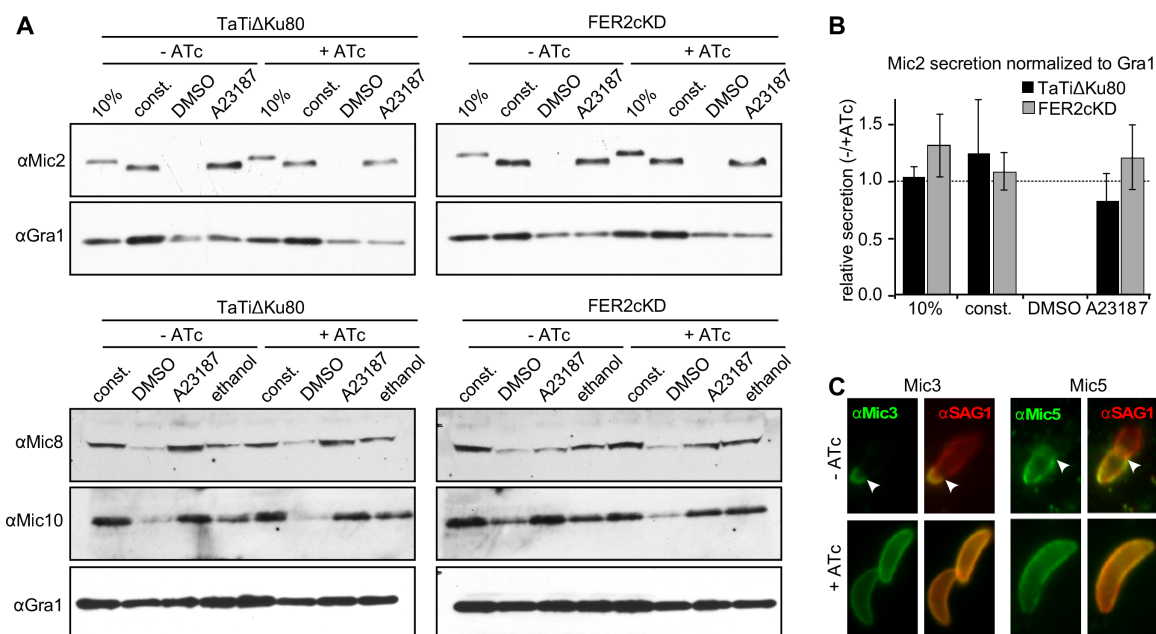

753

754 **FIG 4** Microneme secretion of TgFER2 depleted parasites. (A) Microneme secretion  
755 assay by western blot. The lane labeled “10%” shows total parasite lysate corresponding  
756 with 10% of the parasites used in the secretion assay; const. represents constitutive  
757 secretion of extracellular parasites for 1 hr; A23187 and DMSO represent induced  
758 secretion with Ca<sup>2+</sup> ionophore (1 μM A23187) and the vehicle control for 5 min. Ethanol  
759 represents 1% ethanol as trigger for microneme secretion. Microneme secretion of the  
760 classic population is detected by western blotting with α-Mic2, which shows a size shift  
761 upon secretion, and with α-Mic10. Secretion of the Mic3/5/8/11 microneme population is  
762 monitored with α-Mic8. α-Gra1, which detects dense granule secretion, is used as control.  
763 (B) Quantitation of Mic2 secretion normalized to GRA1 secretion shown in panel A. n=3  
764 ±stdev. No statistical differences detected. (C) Secretion of the Mic3/5/8/11 population  
765 monitored by IFA using α-Mic3 and α-Mic5 (α-Mic8 data in Fig. S5A, B in the  
766 supplementary material). Extracellular FER2-ckD parasites ±ATc were placed on HFF  
767 cells. Host cells were permeabilized by 0.02% saponin (parasites are not permeabilized in  
768 this condition) so that only secreted Mic is detected. α-SAG1 marks the plasma  
769 membrane. Arrowhead marks the site of invading parasites at the boundary where the  
770 apical end of parasites is already inside the host cell and stripped of nearly all Mic and  
771 most SAG1 protein. Single color and phase panels are shown in Supplementary Fig. S5.

772 **Figure 5**

773

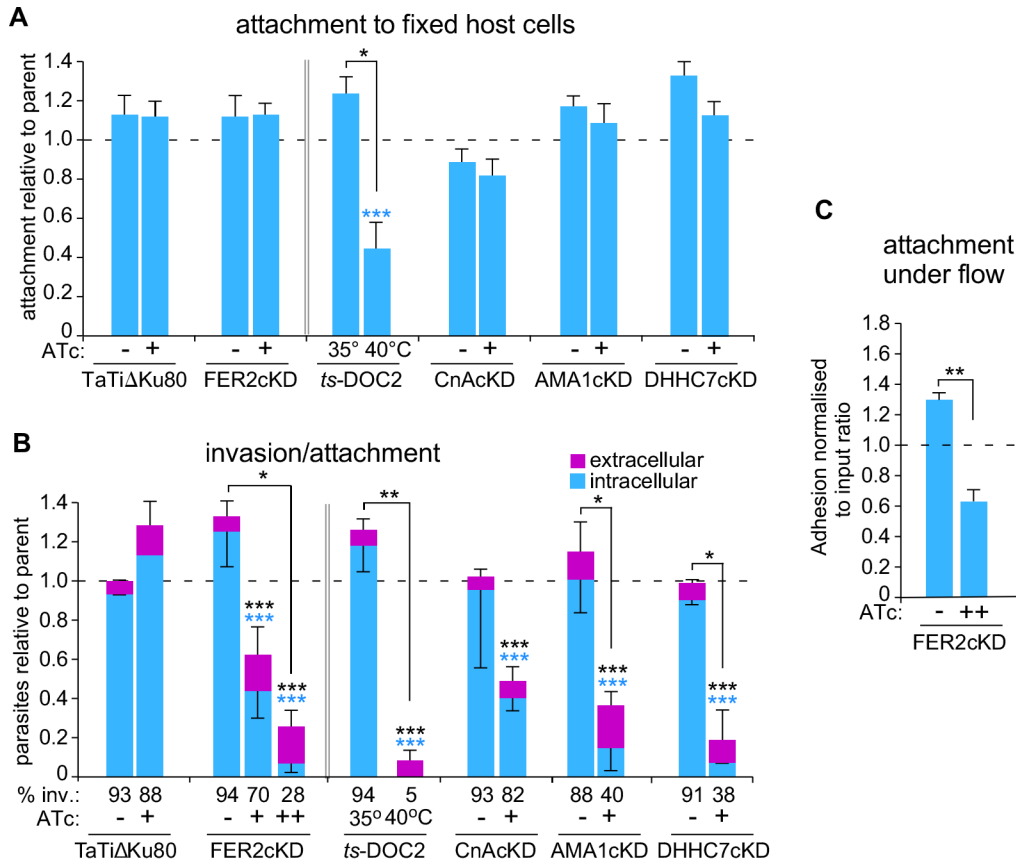

774

775

776 **FIG 5** Invasion and attachment of TgFER2 depleted parasites. (A) Attachment to fixed  
777 HFF cells. Parasites as indicated were mixed 1:1 with the internal control (TaTiΔKu80  
778 parasites expressing cytoplasmic YFP) and exposed to fixed HFF cells. All parasites were  
779 stained with α-SAG1 and control vs. test parasites counted; data are expressed relative to  
780 the internal control of TaTiΔKu80 –ATc (for *ts*-DOC2 TaTiΔKu80 was used for  
781 comparison rather than its direct parent). Mutants were induced with ATc for 48 hr  
782 except *ts*-DOC2, which was induced at 40°C for 48 hr. The dotted line represents the  
783 internal control level. n=5 ±sem. Across samples statistics - or + ATc by one way  
784 ANOVA \*\*\* P<0.0001; Pairwise ±ATc statistics: Student's *t*-test \* P=0.014. (B) 'Red-  
785 green invasion assay' to determine invasion and attachment efficiency. Extracellular  
786 parasites were differentially stained from intracellular parasites with Alexa488  
787 conjugated α-SAG1 before fixation; all parasites were subsequently stained following

788 fixation and permeabilization with Alexa594 conjugated  $\alpha$ -SAG1. For FER2, presence of  
789 ATc marked with “+” reflects 48 hr; “++” reflects 96 hr. n=3 + or - stdev. Across  
790 samples statistics - or + ATc: one way ANOVA; colored asterisks represent the variable  
791 compared across samples; black asterisks represent the total number of parasites. The %  
792 of invaded parasites is indicated at the bottom. Pairwise  $\pm$ ATc statistics: Student’s *t*-test.  
793 \* P<0.01, \*\* P=0.001, \*\*\* P<0.0001. (c) Parasite attachment to HUVECs under fluidic  
794 shear stress. Adhesion of the FER2cKD line  $\pm$ ATc (96 hr) was compared. Parasite  
795 adhesion normalized to the ratio of each parasite population introduced into the fluidic  
796 channel is shown, wherein a value of 1.0 represents equivalent adhesion of the two  
797 populations. n=3 + stdev. \*\*P<0.01 (Student’s *t*-test). See Supplementary Fig. S6 for  
798 additional controls.  
799

800 **Figure 6**

801

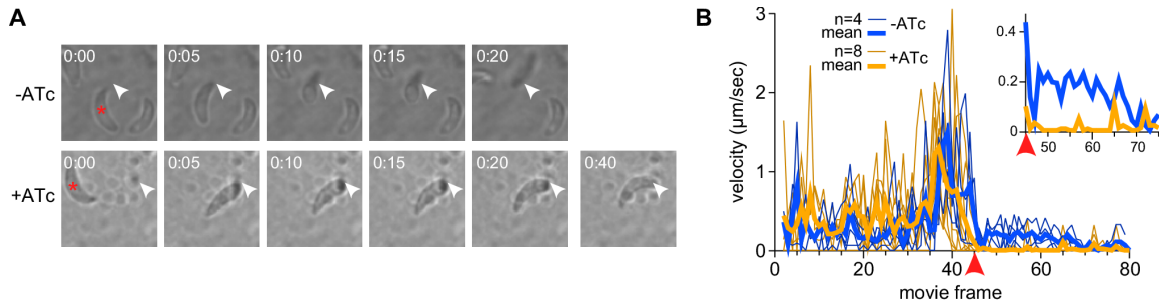

802

803

804 **FIG 6** Impulse motility and host cell invasion. **(A)** Still panels from movies collected in  
805 Supplementary Movie 1 recorded with FER2-ckD parasites  $\pm$ ATc in the presence of host  
806 cells. The TgFER2 replete parasite marked with the asterisk invades the host cell at the  
807 arrowhead. Invasion is complete in 20 seconds. The TgFER2-depleted parasite marked  
808 with asterisk makes an impulse move to the arrowhead and appears to deform the host  
809 cell. However, the parasite does not invade and disengages from the host cell reversing  
810 the deformation in the 40 sec frame. **(B)** Velocity profiles of FER2-ckD parasites  $\pm$ ATc.  
811 The red arrowhead marks the synchronized frame where the parasites  $-$ ATc invade, or  
812 the parasites  $+$ ATc engage the host cell. Each thin line represents a single parasite from a  
813 single movie, heavy lines represent mean values for all parasites in each group included  
814 in the graph. Note that both sets of parasites show an impulse in motility right before the  
815 point of invasion/engagement, followed by an immediate pause, but that only the  
816 TgFER2 replete parasites maintain a positive velocity during the actual host cell invasion  
817 (magnified in the insert).



818 **Figure 7**

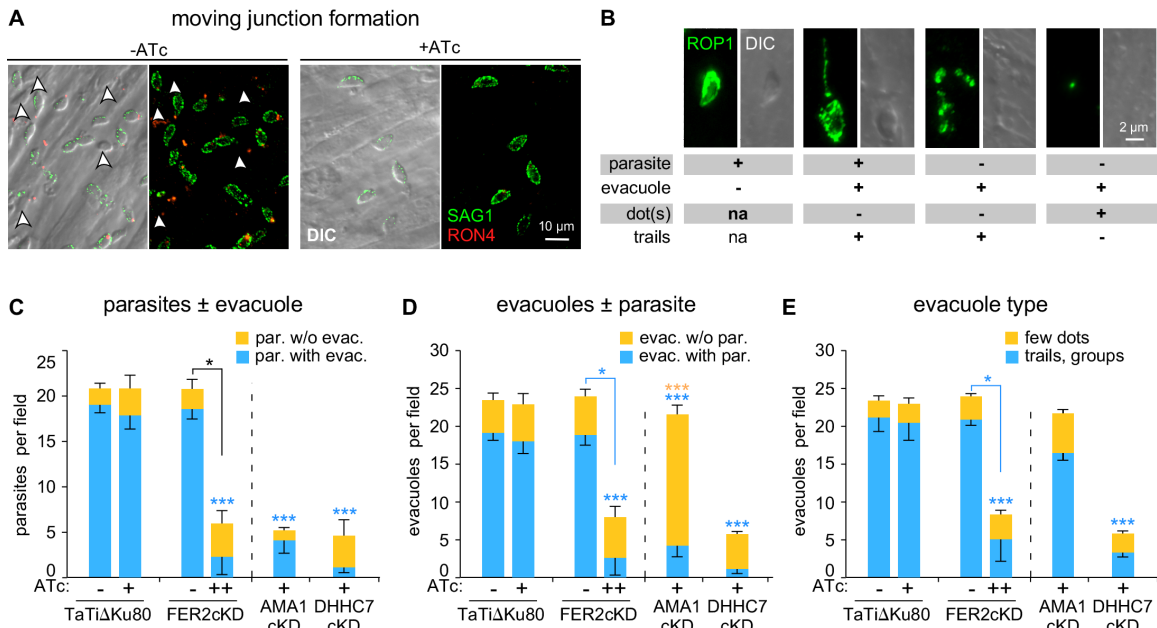

819

820 **FIG 7** Rhopty secretion of TgFER2 depleted parasites is impaired. (A) Formation of the  
 821 MJ. Parasites were incubated with host cells for 10 min. MJ formation was visualized  
 822 with RON4 antiserum under semi-permeabilizing conditions by 0.02% saponin. SAG1  
 823 stains the extracellular portion of the parasites. Arrowheads mark successfully invaded  
 824 parasites that are not accessible to the SAG1 antibodies. Brightness and contrast  
 825 adjustments are made identical for both conditions and thus signals are directly  
 826 comparable. (B) Representative examples of parasite and evacuole features scored in the  
 827 evacuole assay represented in panels C-E. na = not applicable. (C-E) Evacuole assay to  
 828 monitor rhopty bulb secretion and assess stability of the MJ attachment. Parasites as  
 829 indicated were grown under ATc for 48 hr (+) or 96 hr (++) and incubated with host cells  
 830 for 10 min. Evacuole formation was visualized using ROP1 antiserum following  
 831 paraformaldehyde fixation. n=3, + or - stdev; Across samples statistics - or + ATc: one  
 832 way ANOVA correction marked above bar. Pairwise ±ATc statistics marked above  
 833 connector line; Student's *t*-test. \* P<0.01, \*\* P=0.001, \*\*\* P<0.0001. Asterisk color  
 834 corresponds with the variable compared across samples; black asterisks correspond with  
 835 analysis on the total number of parasites. The data presented in these panels are derived  
 836 from the same experiments.
